# Supplementary material for: Limited influence of irrigation on pre-monsoon heat stress in the Indo-Gangetic Plain
Source: PubMed Central journal article supplement (PMC9314405; doi:10.1038/s41467-022-31962-5), 2022-07-25
Supplement: 41467_2022_31962_MOESM1_ESM.pdf [file 41467_2022_31962_MOESM1_ESM.pdf]

# Limited influence of irrigation on pre-monsoon heat stress in the Indo-Gangetic Plain

1 Roshan Jha<sup>1</sup>, Arpita Mondal<sup>1,2\*</sup>, Anjana Devanand<sup>3,4</sup>, M. K. Roxy<sup>5</sup>, Subimal Ghosh<sup>1,2</sup>

2 <sup>1</sup>IDP in Climate Studies, Indian Institute of Technology Bombay, Mumbai, 400076, India,

3 <sup>2</sup>Department of Civil Engineering, Indian Institute of Technology Bombay, Mumbai, 400076,  
4 India,

5 <sup>3</sup>Australian Research Council Centre of Excellence for Climate Extremes, University of New  
6 South Wales, Sydney, NSW, Australia,

7 <sup>4</sup>Climate Change Research Centre, University of New South Wales, Sydney, NSW, Australia,

8 <sup>5</sup>Centre for Climate Change Research, Indian Institute of Tropical Meteorology, Pune, 411008,  
9 India

\*Corresponding Author: [marpita@civil.iitb.ac.in](mailto:marpita@civil.iitb.ac.in)

## Supplementary Information

This supplementary information contains supplementary notes describing the irrigation data preparation for AGR experiment, details about HNG experiment based on Huang et al. irrigation data and parameterisation sensitivity experiment. The supplementary note is followed by supplementary figures and tables.

## 10 Supplementary Notes

11

### 12 Supplementary Note 1: Preparation of irrigation datasets for AGR 13 experiment

14 The WRF-CLM4 model with irrigation, groundwater pumping, and paddy field module  
15 requires the following irrigation data inputs: irrigated area fractions of the grid cells, irrigation  
16 water use over the region, and the proportion of irrigation water used from surface water or  
17 groundwater sources.

18 The district-wise annual agricultural census data provided by the Directorate of Economics &  
19 Statistics, Ministry Of Agriculture and Farmers Welfare, Government of India<sup>1</sup>  
20 (<https://aps.dac.gov.in/LUS/Public/Reports.aspx>) is used to estimate pre-monsoon irrigation  
21 data from 2004 to 2016. The annual data includes variables like land-use area, area under the  
22 crop, crop irrigated area, and source wise irrigated area for different crops at seasonal/annual  
23 scale. The five crops (Rice, Maize, Gram, Sunflower, and Sugarcane) are chosen based on crop  
24 production statistics ([https://aps.dac.gov.in/APY/Public\\_Report1.aspx](https://aps.dac.gov.in/APY/Public_Report1.aspx)) of pre-monsoon season  
25 and crop calendar published in the annual Indian Agricultural Statistics report (Supplementary  
26 Table 1).

27 Here, area under the crop and crop irrigated area for Indo-Gangetic Plain states (Bihar, Uttar  
28 Pradesh, Haryana, Punjab, and Rajasthan) are used to estimate the irrigation area fractions of  
29 grid cells for five crops (Rice, Maize, Gram, Sunflower and Sugarcane). The source wise  
30 irrigated area (groundwater or surface water) is used to prescribe the proportion of groundwater  
31 or surface irrigation water use.

32 In India, the flood irrigation system is widely practiced using surface water or groundwater  
33 sources<sup>2</sup>. The seasonal water use (mm/hectare) for flood irrigation of these crops based on field  
34 surveys<sup>2</sup> as shown in Supplementary Table 1 are used to calculate the pre-monsoon season  
35 irrigation water use (mm/day) for the five states. The data for paddy and non-paddy (all crops  
36 except rice/paddy) crops are used to model the three new plant functional types (PFTs) to  
37 represent irrigated crops, irrigated paddy fields, and rain-fed paddy fields present in the  
38 irrigation module. The rain-fed paddy field data is assumed zero as farmers are mostly  
39 dependent on irrigation water during the pre-monsoon season.

40 Further, the district-level census estimates (irrigation area fraction, irrigation water use and  
41 proportion of groundwater and surface irrigation water use) are interpolated to a regular grid of  
42 spatial resolution  $0.5^{\circ} \times 0.5^{\circ}$  for the model input.

43 For the rest of the Indian states, agricultural census estimates during pre-monsoon season are  
44 not available. Hence, the irrigation area fraction of the grid cells and source irrigated area are  
45 taken from the Food and Agricultural Organisation (FAO) Global Map of Irrigated Areas  
46 (GMIA)<sup>3</sup>, and the irrigation water use is taken from average irrigation water withdrawal data  
47 developed by Huang et al.<sup>4</sup> from four water models on a  $0.5^{\circ}$  grid using the GMIA dataset.  
48 Here, irrigation water use estimates from Huang et al.<sup>4</sup> are taken for the period 2004 to 2010,  
49 and the data for 2010 is used to prescribe the irrigation during 2011 to 2016 over the model  
50 domain except for the five states.

51 Finally, the daily irrigation data inputs from two different sources are merged at  $0.5^{\circ} \times 0.5^{\circ}$   
52 spatial resolution. The irrigation input files for each pre-monsoon season from 2004 to 2016  
53 contain the following variables.

- 54 • Non-paddy irrigation use (mm/day)
- 55 • Paddy irrigation use (mm/day)
- 56 • Fraction of water from the ground (F\_grd)
- 57 • Fraction of water from surface (F\_Surf)
- 58 • Non-paddy irrigated area fraction
- 59 • Paddy Irrigated area fraction
- 60 • Paddy rainfed area fraction (assumed as zero for pre-monsoon)

61

## 62 Supplementary Note 2: Response of near-surface climate variables to 63 Huang et al. monthly irrigation withdrawal dataset

64 The irrigation water-use is estimated from average irrigation water withdrawal data developed  
65 by Huang et al.<sup>4</sup> from four water models on a  $0.5^{\circ}$  grid using the GMIA dataset. Here, two sets  
66 of seasonal pre-monsoon (Feb-May) simulations are performed for 2004, 2008, 2012, and  
67 2016, with two initial months taken as spin-off time at the horizontal spatial resolution of 30km  
68 and 30 vertical levels using coupled WRF-CLM model. Two simulations: CTL (irrigation-off)  
69 and HNG (irrigation-on with Huang et al. irrigation data), uses initial and lateral boundary  
70 conditions from European Centre for Medium-Range Weather Forecast Interim Re-Analysis.  
71 The influence of Huang et al. irrigation data on near-surface variables has higher cooling and

72 moistening effect than the agricultural census-based data (Supplementary Figure 9). One of the  
73 reasons behind the over-estimation of irrigation impact may be the estimation of a higher  
74 irrigation requirement during dry April-May months in water models used in Huang et al.  
75 study, failing to acknowledge the pre-monsoon irrigation practice in Indo-Gangetic Plain. The  
76 variable meteorological response in the HNG experiment over Indo-Gangetic Plain is higher  
77 because of the very high irrigation area fraction given by GMIA datasets.

78

### 79 **Supplementary Note 3: Sensitivity of irrigation influence to different** 80 **WRF parameterization schemes**

81 To check the sensitivity of irrigation influence to different WRF parameterization schemes, we  
82 employed three combination of PBL-Microphysics-Cumulus parameterization schemes along  
83 with a newer version of the Rapid Radiative Transfer Model (RRTMG) for longwave and  
84 Dudhia scheme for shortwave radiation represents radiation schemes, and a revised MM5  
85 surface layer scheme based on Monin-Obukhov Similarity Theory is used for surface layer  
86 scheme.

- 87 a. C1: Mellor-Yamada Nakanishi and Niino Level 3-WRF Double-Moment 6-class  
88 scheme- Tiedtke scheme (MYNN3-WDM6-Tiedtke)
- 89 b. C2: Mellor-Yamada Nakanishi and Niino Level 3-WRF Single-Moment 6-class  
90 scheme-KF scheme (MYNN3-WSM6-KF)
- 91 c. C3: Mellor-Yamada Nakanishi and Niino Level 3- WRF Single-Moment 6-class  
92 scheme- Grell 3D (MYNN3-WSM6-Grell3D)

93 Three sets of seasonal pre-monsoon (Feb-May) simulations are performed from 2004 to 2016,  
94 with two initial months taken as spin-off time at the horizontal spatial resolution of 30km and  
95 30 vertical levels using coupled WRF-CLM model. All three simulations: CTL (irrigation-off),  
96 AGR (irrigation-on with agricultural census-based irrigation data), and MOD (irrigation-on  
97 with model-estimated irrigation data), uses initial and lateral boundary conditions from  
98 European Centre for Medium-Range Weather Forecast Interim Re-Analysis<sup>41</sup>.

99 The sensitivity test of daily mean temperature (Supplementary Fig. 11), daily maximum  
100 temperature (Supplementary Fig. 12), and wet-bulb temperature (Supplementary Fig. 13)  
101 response to model-estimated irrigation and agricultural census-based irrigation for a different  
102 combination of parameterization schemes show results are quite robust. The error bar diagram  
103 shows that the agricultural census-based irrigation has a similar influence with three

104 parameterization combinations with mean irrigation cooling of 0.37°C for daily mean  
105 temperature and 0.5°C for daily maximum temperature and mean moistening effect of 0.26°C  
106 for wet-bulb temperature (Supplementary Fig. 14). Further, the model-estimated irrigation  
107 influence is over-estimated in all the combinations of parameterization schemes.

108

## 109 **References**

- 110 1. Government of India. *Agricultural Statistics At a Glance 2020*. Government of India  
111 Ministry of Agriculture Department of Agriculture and Cooperation Directorate of  
112 Economics and Statistics (2020).
- 113 2. Fishman, R., Devineni, N. & Raman, S. Can improved agricultural water use efficiency  
114 save India's groundwater? *Environ. Res. Lett.* **10**, (2015).
- 115 3. Siebert, S., Henrich, V., Frenken, K. & Burke, J. Update of the digital global map of  
116 irrigation areas to version 5. *Rheinische Friedrich-Wilhelms-Universituy, Bonn, Ger.*  
117 *Food Agric. Organ. United Nations, Rome, Italy* 171 (2013).
- 118 4. Huang, Z. *et al.* Reconstruction of global gridded monthly sectoral water withdrawals  
119 for 1971-2010 and analysis of their spatiotemporal patterns. *Hydrol. Earth Syst. Sci.* **22**,  
120 2117–2133 (2018).

## Supplementary Figures

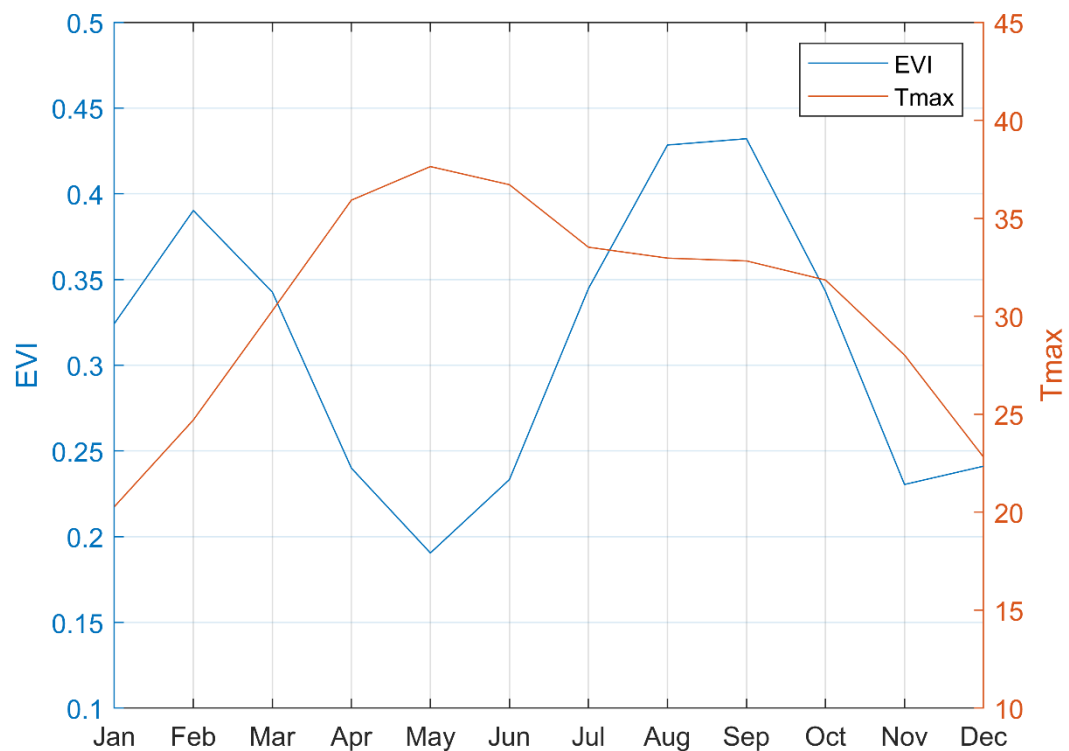

121 **Supplementary Figure 1. Tmax and EVI Climatology.** Climatology of Indian  
122 Meteorological Department (IMD) observed daily maximum temperature (Tmax) from 1981-  
123 2020 and MODIS EVI from 2000-2020 for Indo-Gangetic Plain. Apr–May is pre-monsoon and  
124 non-cropping season. Jun–Sep is monsoon and cropping season (Kharif).

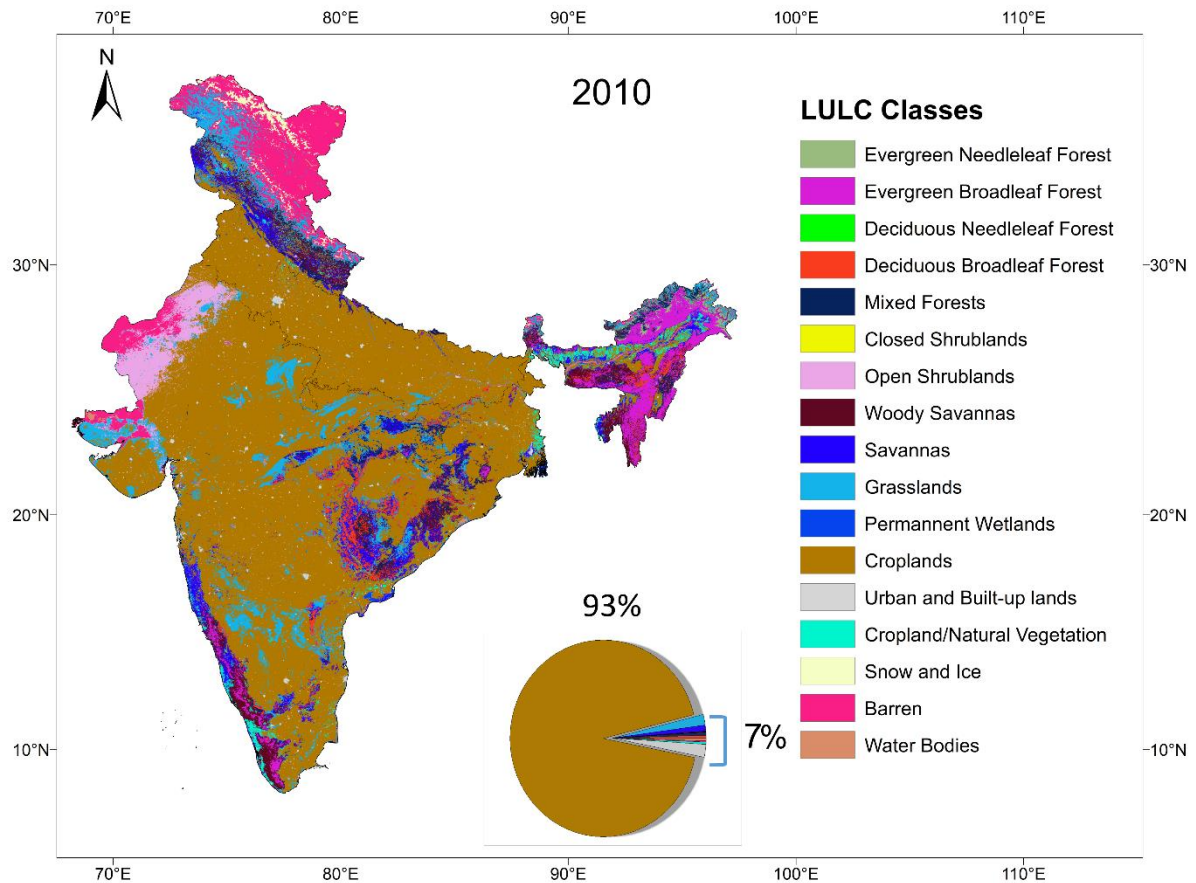

125 **Supplementary Figure 2. Proportion of croplands in Indo-Gangetic Plain.** Land use and  
 126 land cover during 2010 from Moderate Resolution Imaging Spectroradiometer (MODIS)  
 127 International Geosphere–Biosphere Programme (IGBP) classification scheme at 500m spatial  
 128 resolution. The pie-chart shows the proportion of different land use land cover in the Indo-  
 129 Gangetic Plain.

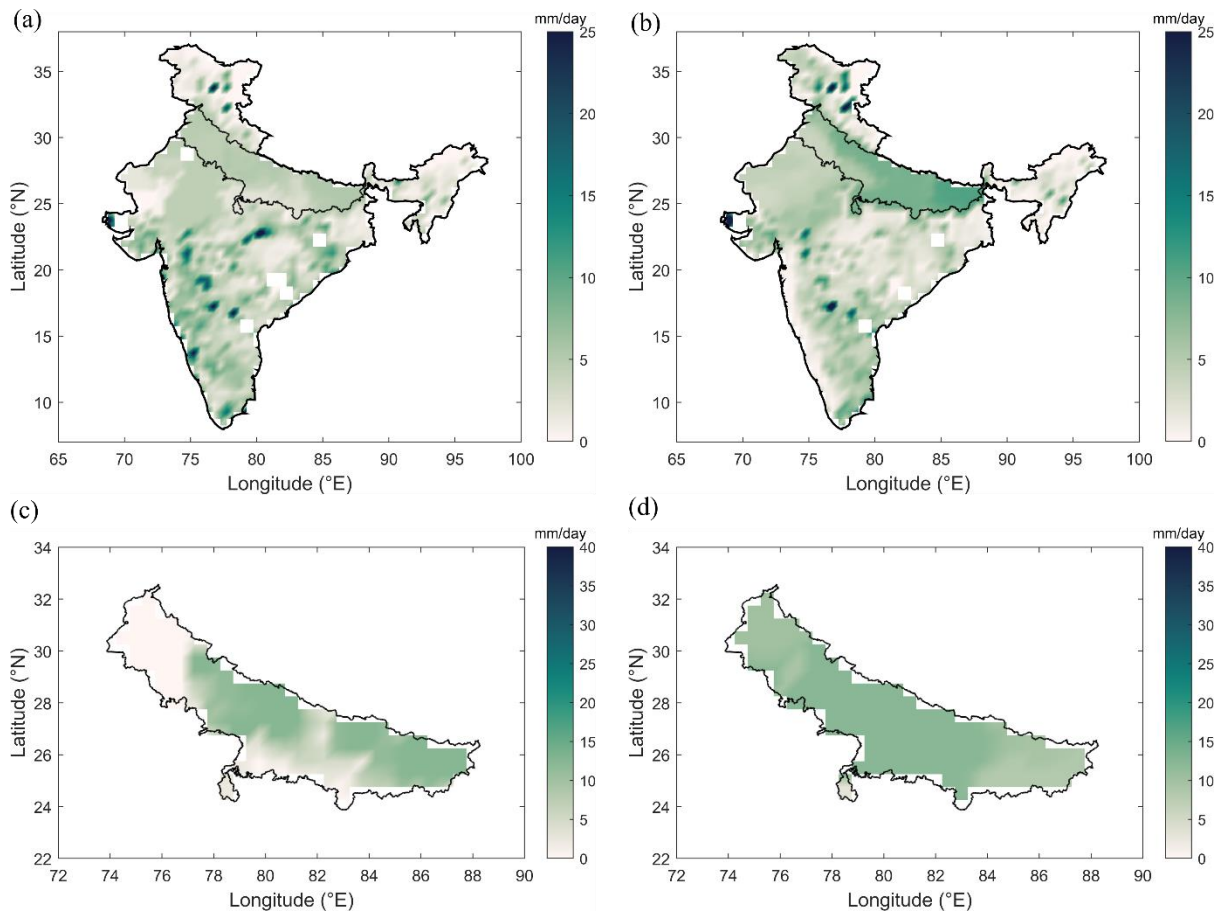

130 **Supplementary Figure 3. Irrigation water use during pre-monsoon and monsoon.** Mean  
 131 (2004-2016) paddy and non-paddy crop irrigation water use from agricultural census-based  
 132 data. (a) Pre-monsoon non-paddy wateruse (b) Monsoon non-paddy wateruse (c) Pre-monsoon  
 133 paddy wateruse (d) Monsoon paddy wateruse



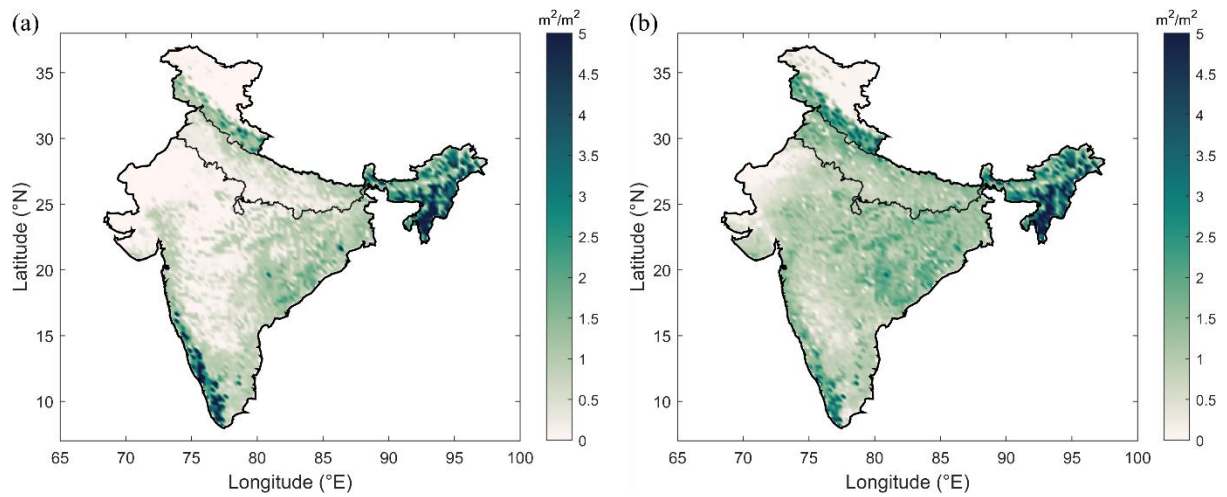

134 **Supplementary Figure 4. Comparison of leaf area index (LAI).** Mean LAI ( $\text{m}^2/\text{m}^2$ ) for the  
135 period 2001-2020 from Moderate Resolution Imaging Spectroradiometer (MODIS) for (a) Pre-  
136 monsoon (b) Monsoon

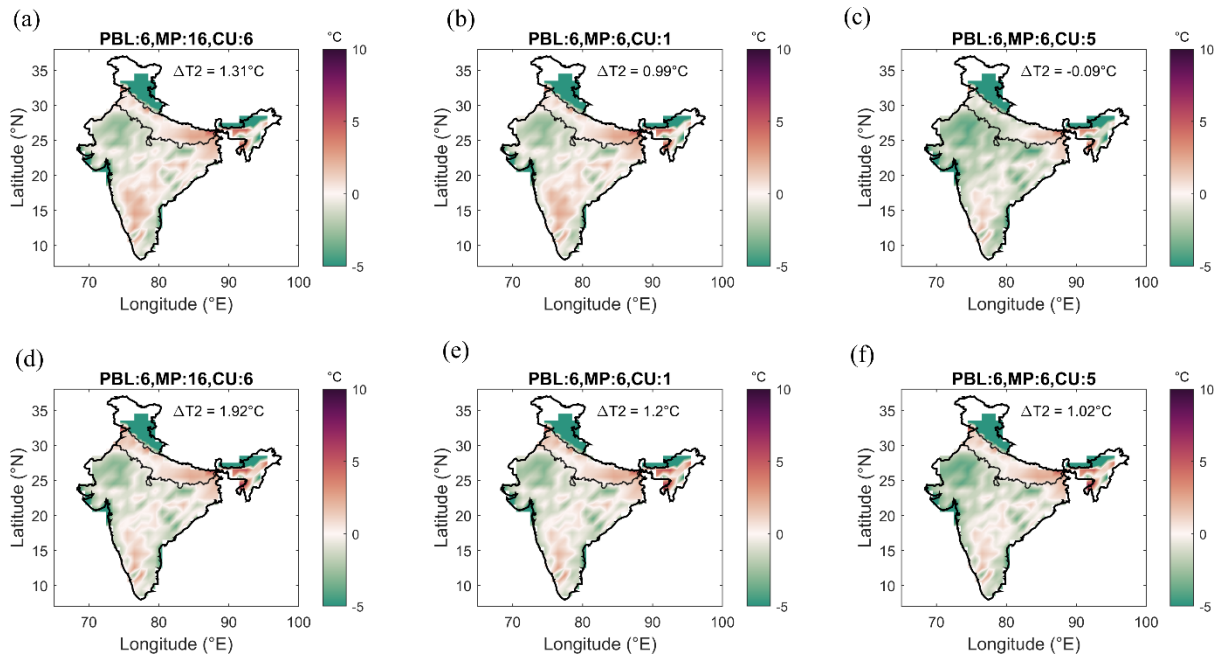

137 **Supplementary Figure 5. Comparison of model simulated daily temperature data with**  
 138 **IMD observed data.** Difference between AGR simulated and IMD daily mean temperature of  
 139 April-May for different parameterization combination (C1-PBL:6,MP:16,CU:6; C2-  
 140 PBL:6,MP:6,CU:1; C3-PBL:6,MP:6,CU:5) for (a,b,c) 2004 (d,e,f) 2006. [C1:MYNN3-  
 141 WDM6-Tiedtke, C2:MYNN3-WSM6-KF C3:MYNN3-WSM6-Grell3D]

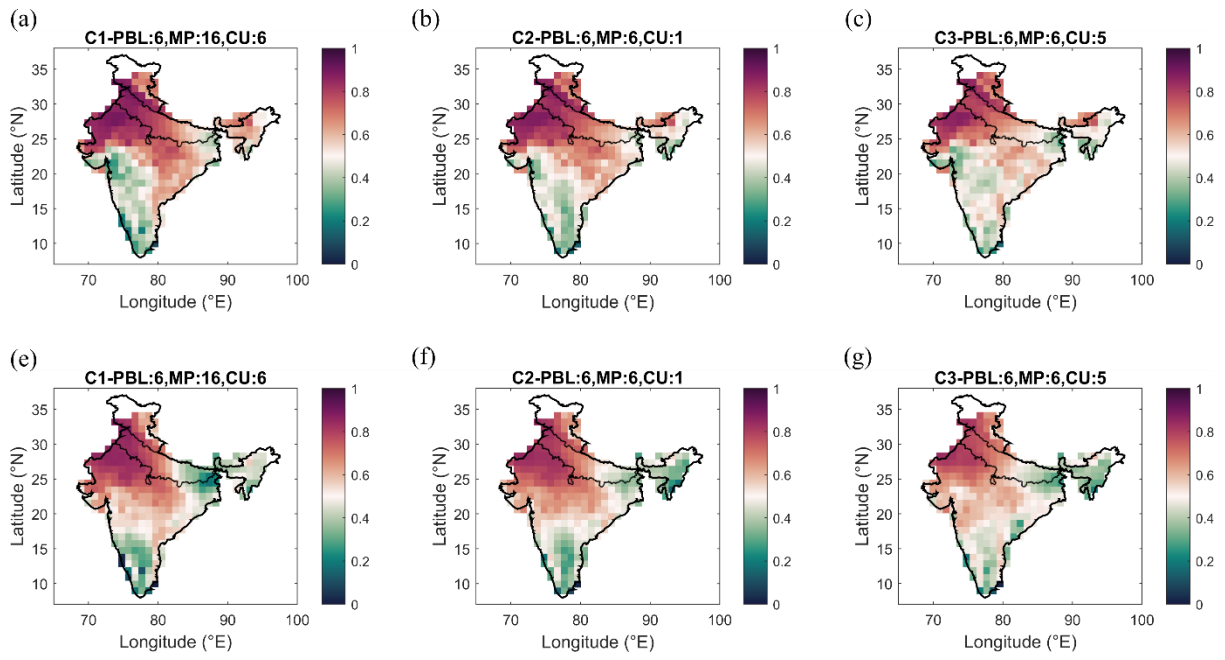

142 **Supplementary Figure 6. Pattern correlation of model simulated daily temperature data**  
 143 **with IMD observed data.** Correlation coefficient between model simulated with three  
 144 parameterization scheme (C1, C2 & C3) and IMD observed data for Apr-May (2004-2016) for  
 145 (a,b,c) T2 and (d,e,f) Tmax. [C1:MYNN3-WDM6-Tiedtke, C2:MYNN3-WSM6-KF  
 146 C3:MYNN3-WSM6-Grell3D]

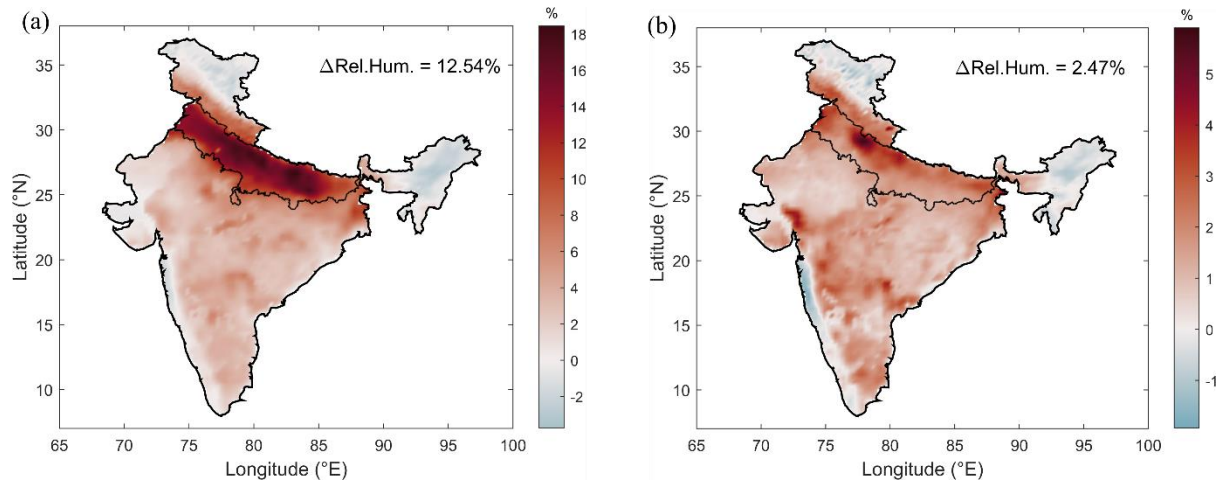

147 **Supplementary Figure 7. Impact of model-estimated and agricultural census-based**  
 148 **irrigation volume on Relative Humidity.** Mean (2004-2016) difference in land surface  
 149 temperature ( $^{\circ}\text{C}$ ) between different scenarios (a) Influence of model-estimated Irrigation  
 150 (MOD - CTL) (b) Influence of agricultural census irrigation (AGR - CTL). The mean  
 151 difference spatially averaged over Indo-Gangetic Plain is shown as  $\Delta\text{LST}$ . CTL represents  
 152 WRF-CLM4 simulation with no irrigation, AGR represents WRF-CLM4 simulation with  
 153 agricultural census-based irrigation data and MOD represents WRF-CLM4 simulation with  
 154 model-estimated irrigation data.

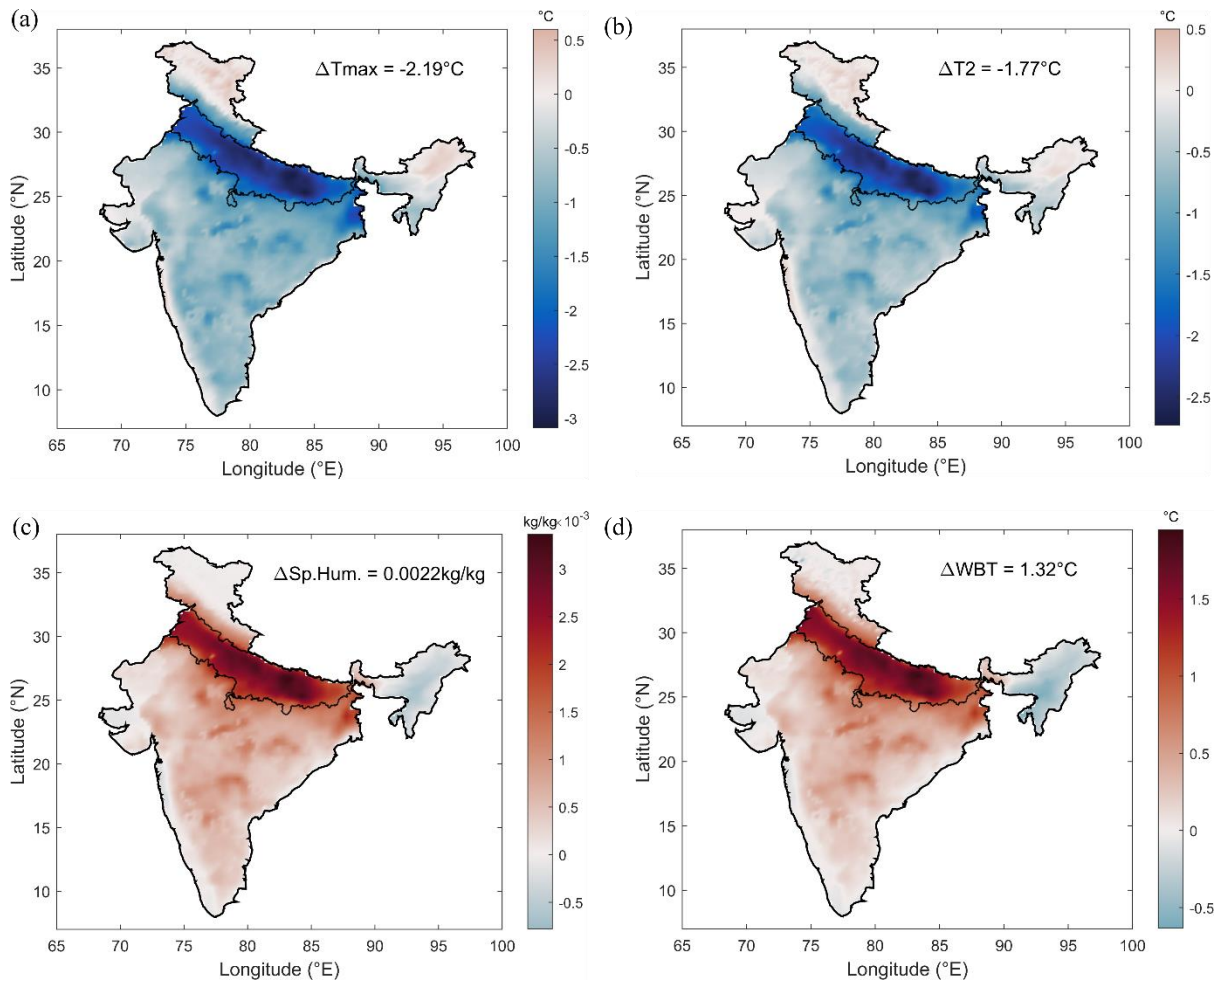

155 **Supplementary Figure 8. Impact of model-estimated irrigation on mean temperature,**  
 156 **specific humidity and heat fluxes.** Difference between MOD and CTL experiment during pre-  
 157 pre-monsoon season (April-May) from 2004-2016 for (a) Daily Maximum Temperature (°C) (b)  
 158 Daily Mean Temperature (°C) (c) Specific Humidity (kg/kg) (d) Wet-bulb Temperature (°C).  
 159 CTL represents WRF-CLM4 simulation with no irrigation and MOD represents WRF-CLM4  
 160 simulation with model-estimated irrigation data.

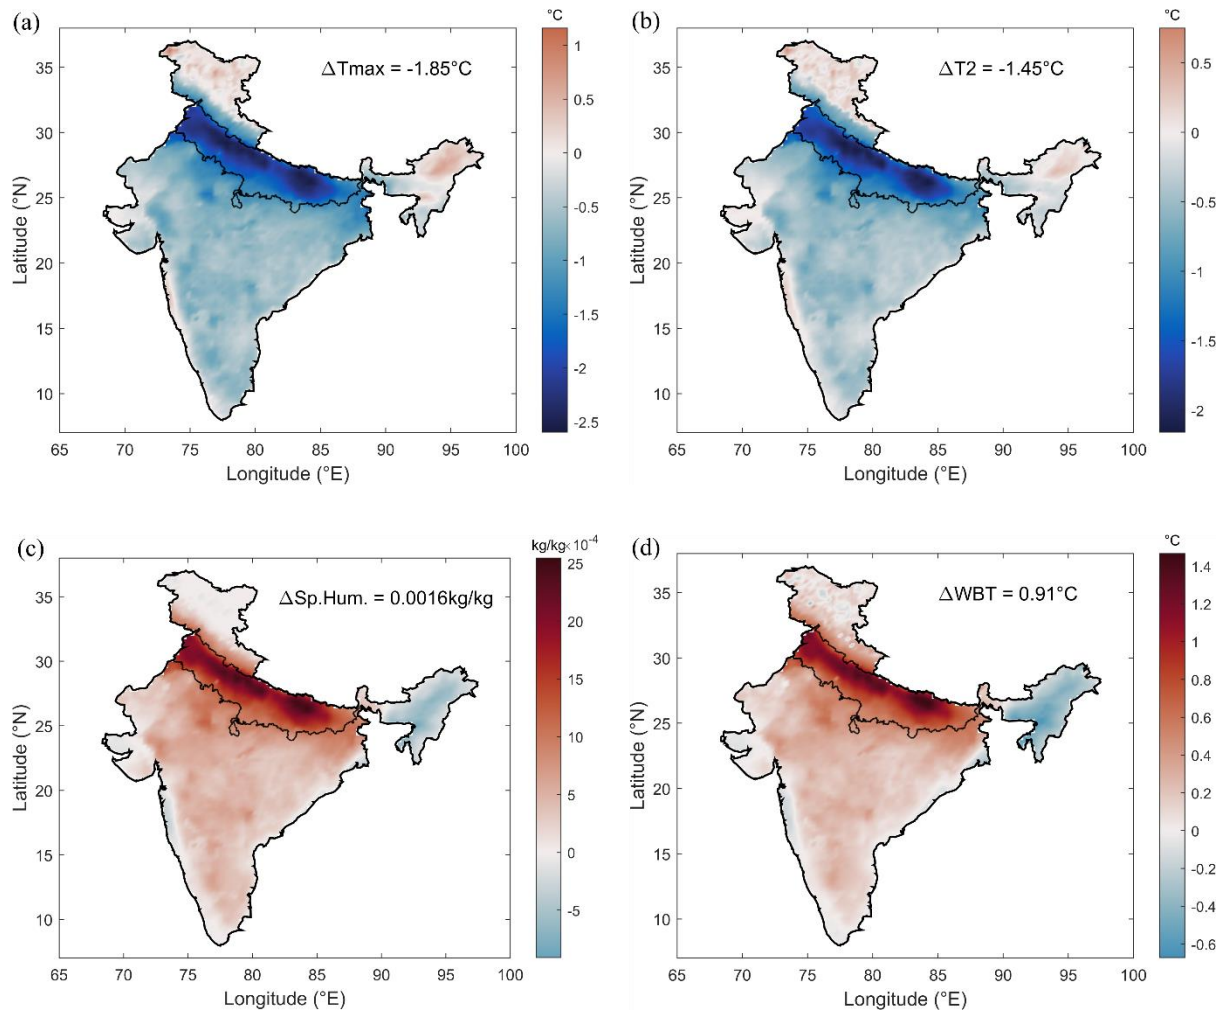

161 **Supplementary Figure 9. Impact of Huang et al. irrigation on daily maximum**  
 162 **temperature, daily mean temperature, specific humidity and wet-bulb temperature.**  
 163 Difference between HNG and CTL experiment during pre-monsoon season (April-May) for  
 164 (a) Daily Maximum Temperature ( $^{\circ}\text{C}$ ) (b) Daily Mean Temperature ( $^{\circ}\text{C}$ ) (c) Specific Humidity  
 165 ( $\text{kg/kg}$ ) (d) Wet-bulb Temperature ( $^{\circ}\text{C}$ ). CTL represents WRF-CLM4 simulation with no  
 166 irrigation and HNG represents WRF-CLM4 simulation with Huang et al. monthly irrigation  
 167 withdrawal data.

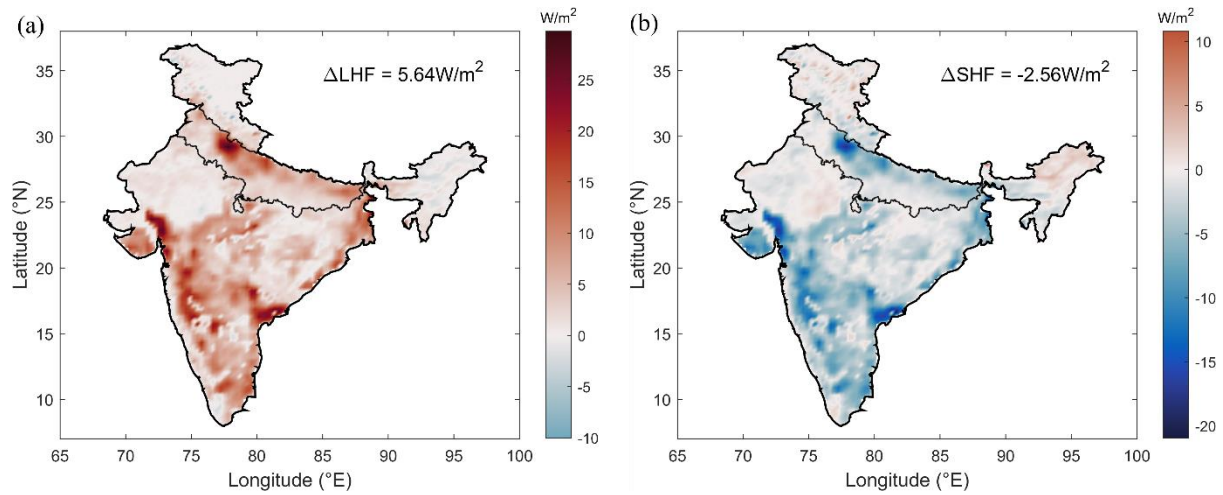

168 **Supplementary Figure 10. Impact of agricultural census based irrigation on heat fluxes.**  
 169 Difference between AGR and CTL experiment during pre-monsoon season (April-May) from  
 170 2004-2016 for (a) Latent heat flux ( $\text{W/m}^2$ ) (b) Sensible heat flux ( $\text{W/m}^2$ ). CTL represents WRF-  
 171 CLM4 simulation with no irrigation and AGR represents WRF-CLM4 simulation with  
 172 agricultural census-based irrigation data.

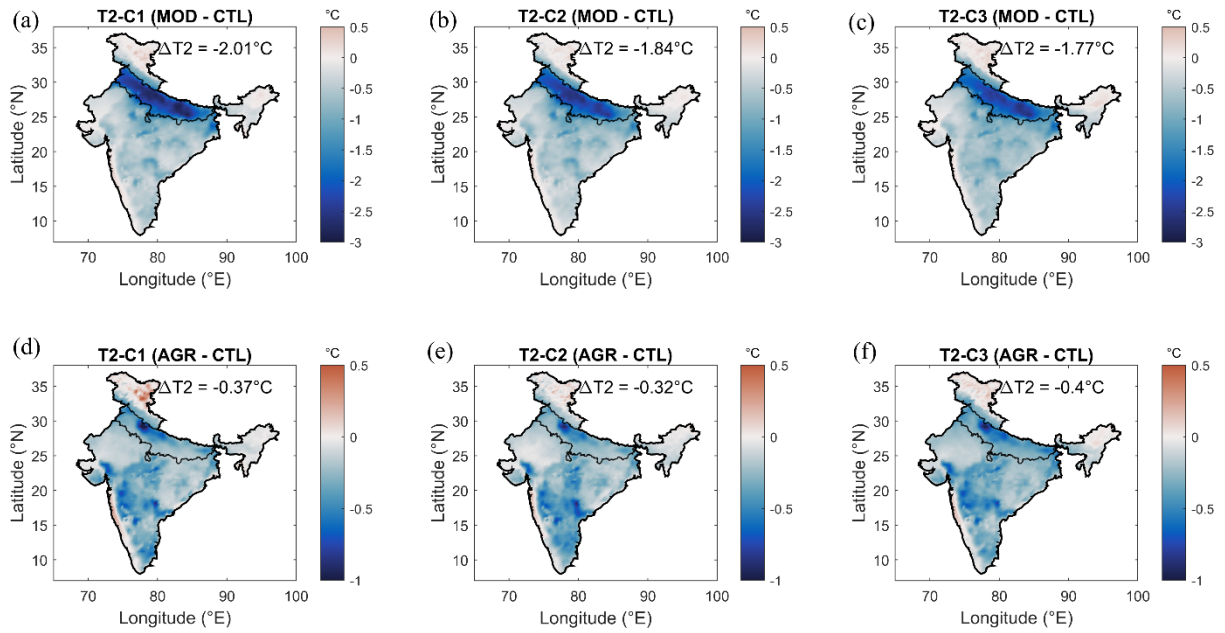

173 **Supplementary Figure 11. Parameterization sensitivity of daily mean temperature**  
 174 **response to model-simulated irrigation and census-based irrigation.** Difference between  
 175 daily mean temperature of MOD and CTL experiment during pre-monsoon season (April-May)  
 176 from 2004-2016 for (a)C1:MYNN3-WDM6-Tiedtke (b)C2:MYNN3-WSM6-KF  
 177 (c)C3:MYNN3-WSM6-Grell3D. (d-f) Same as a-c but for difference between daily mean  
 178 temperature of AGR and CTL experiment



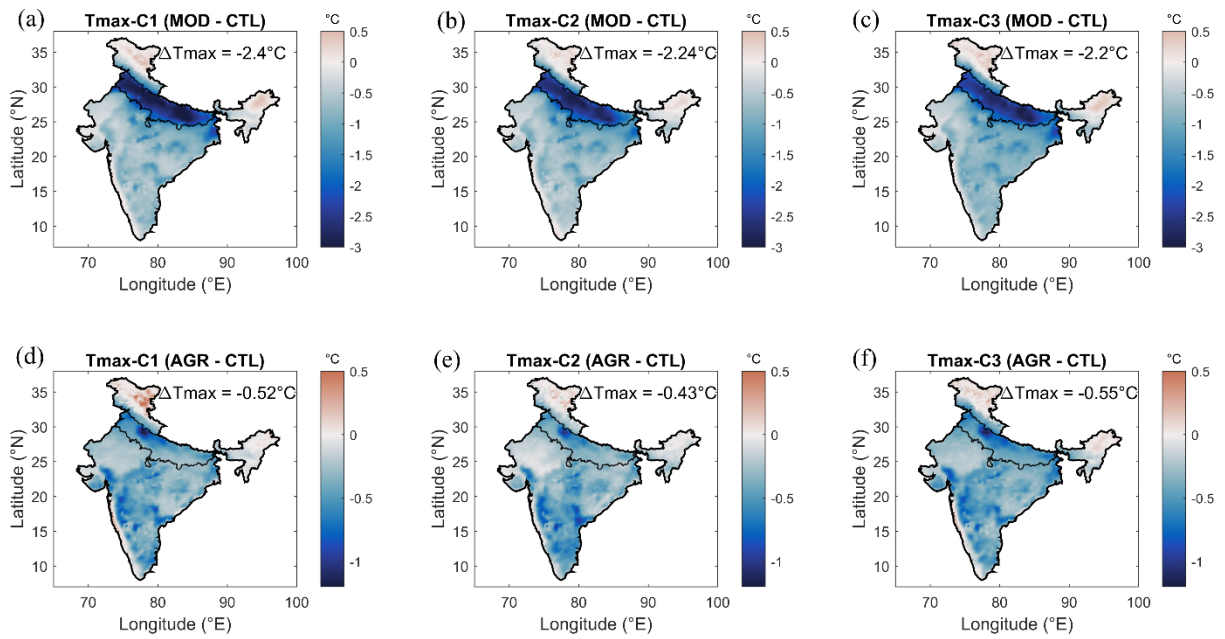

179 **Supplementary Figure 12. Parameterization sensitivity of daily maximum temperature**  
 180 **response to model-simulated irrigation and census-based irrigation.** Difference between  
 181 daily maximum temperature of MOD and CTL experiment during pre-monsoon season (April-  
 182 May) from 2004-2016 for (a)C1:MYNN3-WDM6-Tiedtke (b)C2:MYNN3-WSM6-KF  
 183 (c)C3:MYNN3-WSM6-Grell3D. (d-f) Same as a-c but for difference between daily maximum  
 184 temperature of AGR and CTL experiment.

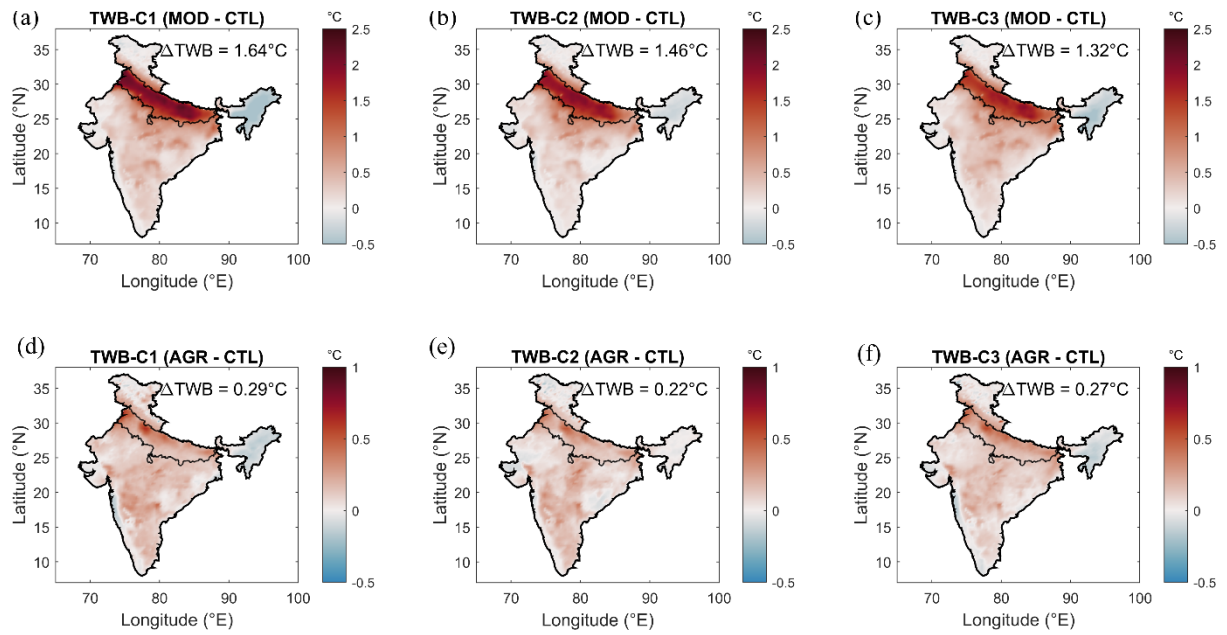

185 **Supplementary Figure 13. Parameterization sensitivity of wet-bulb temperature response**  
 186 **to model-simulated irrigation and census-based irrigation.** Difference between wet-bulb  
 187 temperature of MOD and CTL experiment during pre-monsoon season (April-May) from 2004-  
 188 2016 for (a)C1:MYNN3-WDM6-Tiedtke (b)C2:MYNN3-WSM6-KF (c)C3:MYNN3-WSM6-  
 189 Grell3D. (d-f) Same as a-c but for difference between wet-bulb temperature of AGR and CTL  
 190 experiment.

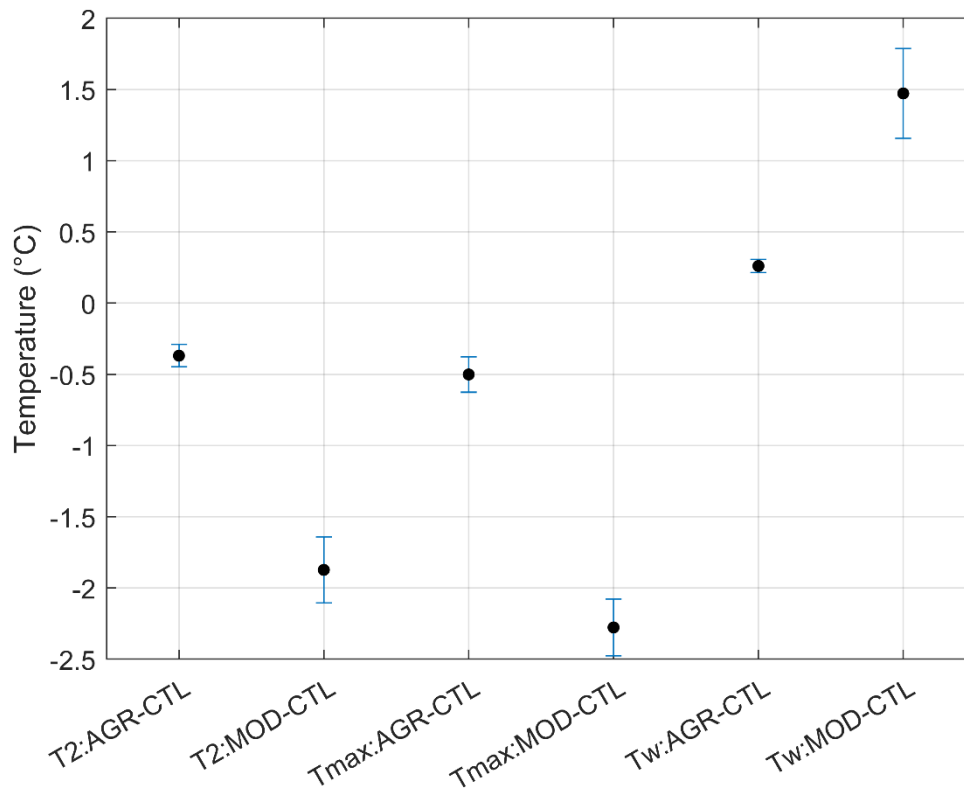

191 **Supplementary Figure 14. Sensitivity to parameterization combination in Indo-Gangetic**  
 192 **Plain.** Sensitivity of daily mean temperature, daily maximum temperature and wet-bulb  
 193 temperature spatially averaged over Indo-Gangetic Plain to different parameterization  
 194 combination for model-simulated (MOD) irrigation and agricultural census-based (AGR)  
 195 irrigation.

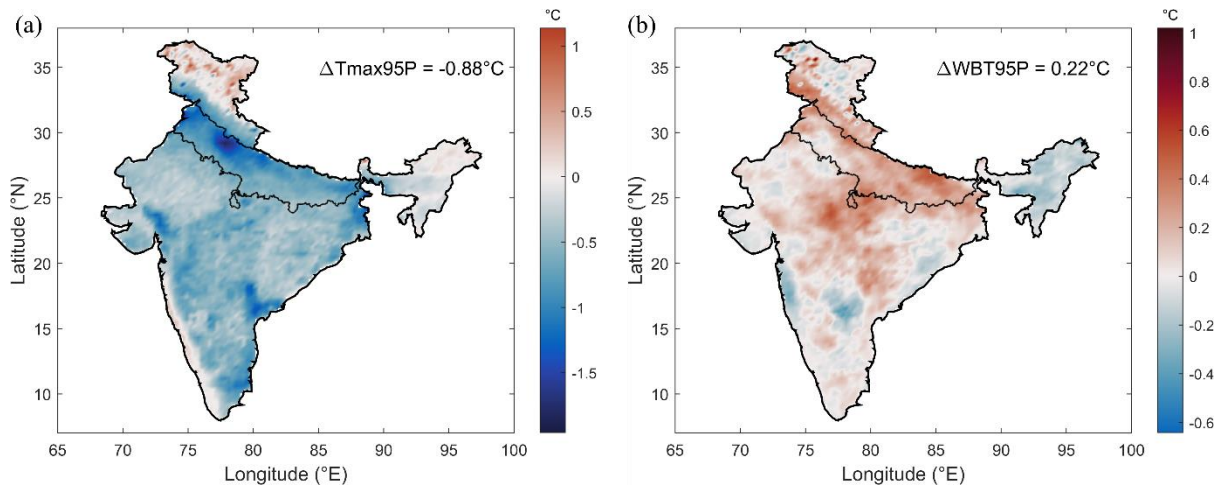

196 **Supplementary Figure 15. Impact of agricultural census based irrigation on 95<sup>th</sup>**  
 197 **Percentiles of daily maximum temperature and wet-bulb temperature.** Difference between  
 198 AGR and CTL experiment during pre-monsoon season (April-May) from 2004-2016 for the  
 199 95<sup>th</sup> percentile of (a) Daily Maximum Temperature ( $^{\circ}\text{C}$ ) (b) Wet bulb Temperature ( $^{\circ}\text{C}$ ). CTL  
 200 represents WRF-CLM4 simulation with no irrigation and AGR represents WRF-CLM4  
 201 simulation with agricultural census-based irrigation data.

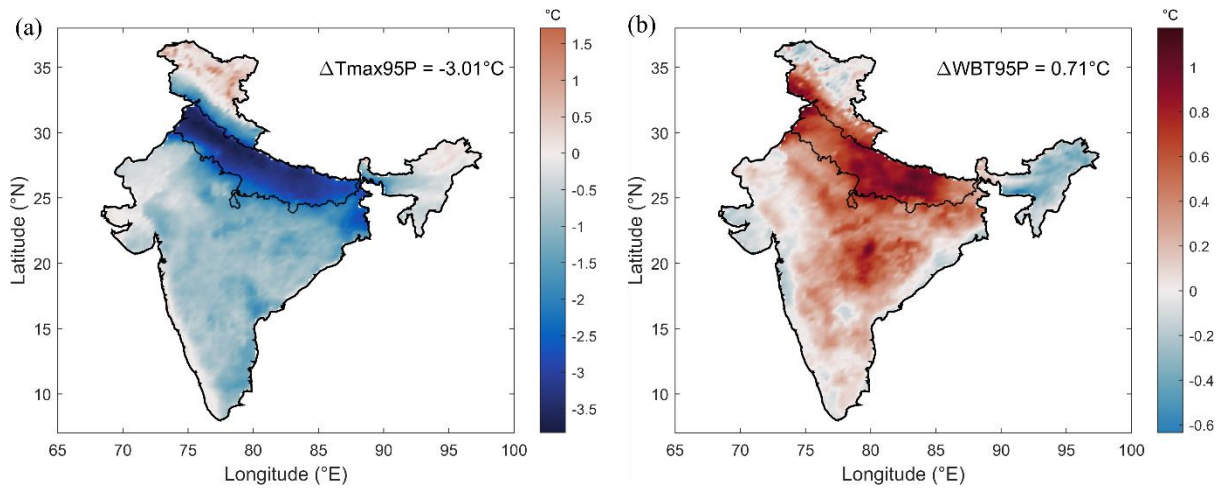

202 **Supplementary Figure 16. Impact of model-estimated irrigation on 95<sup>th</sup> Percentiles of**  
 203 **daily maximum temperature and wet-bulb temperature.** Difference between MOD and  
 204 CTL experiment during pre-monsoon season (April-May) from 2004-2016 for the 95<sup>th</sup>  
 205 percentile of (a) Daily Maximum Temperature (°C) (b) Wet bulb Temperature (°C). CTL  
 206 represents WRF-CLM4 simulation with no irrigation and MOD represents WRF-CLM4  
 207 simulation with model-estimated irrigation data.

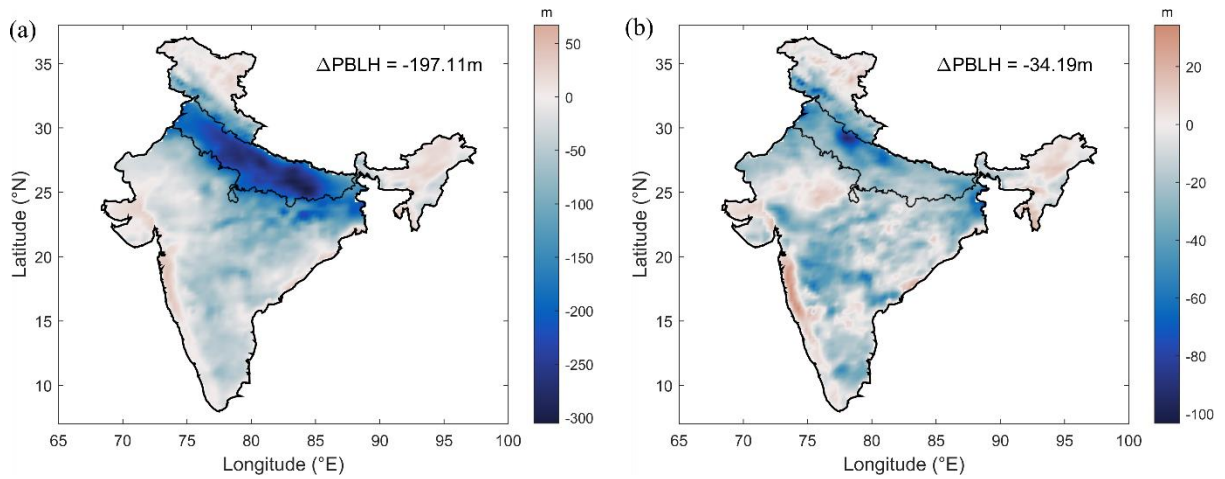

208 **Supplementary Figure 17. Impact of model-estimated irrigation and agricultural census-**  
 209 **based irrigation on Planetary Boundary Layer (PBL) height.** Difference between (a) MOD  
 210 and CTL experiment (b) AGR and CTL experiment during pre-monsoon season (April-May)  
 211 from 2004-2016 for PBL height. CTL represents WRF-CLM4 simulation with no irrigation,  
 212 AGR represents WRF-CLM4 simulation with agricultural census-based irrigation data and  
 213 MOD represents WRF-CLM4 simulation with model-estimated irrigation data.

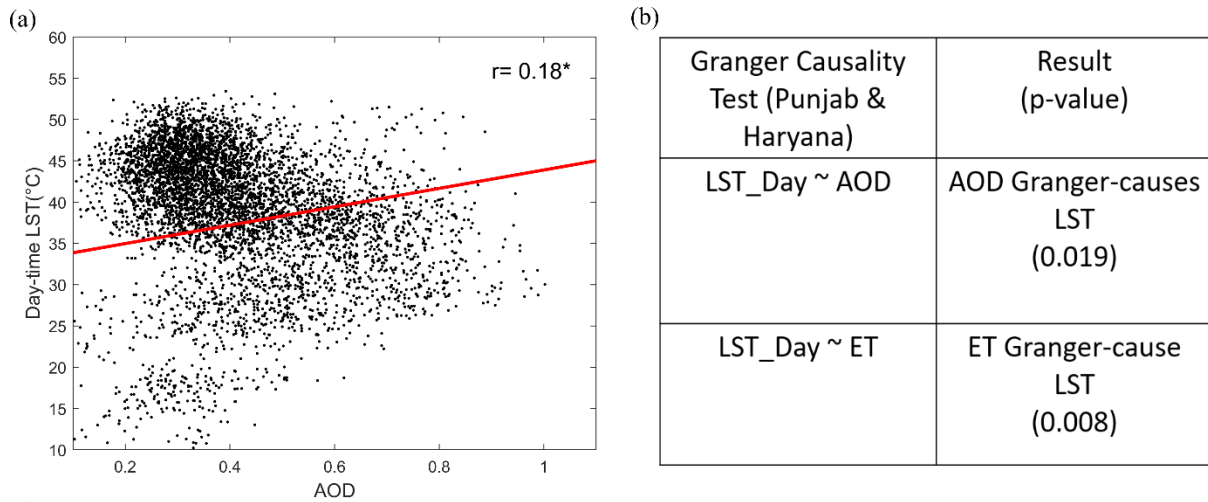

214 **Supplementary Figure 18.** (a) Scatter Plot between Day-time LST and AOD with Pearson's  
 215 correlation coefficient( $r$ ) for India. (b) Causal relationship between variables for West Indo-  
 216 Gangetic Plain (Punjab and Haryana): Aerosol Optical Depth (AOD), Evapotranspiration (ET)  
 217 and day-time land surface temperature (LST) from MODIS using Granger causality test in  
 218 vector auto-regression model (VAR) framework. The null hypothesis for the test is that lagged  
 219 Variable1 do not explain the variation in Variable2.

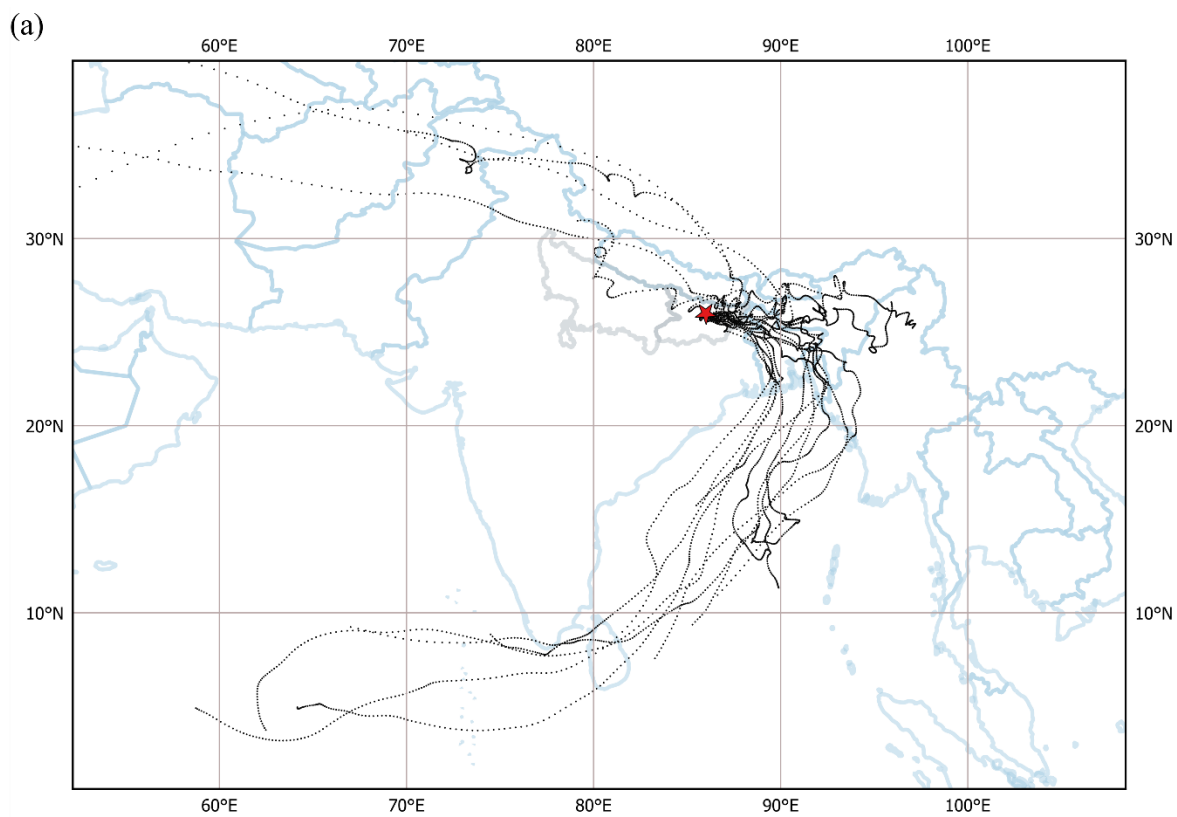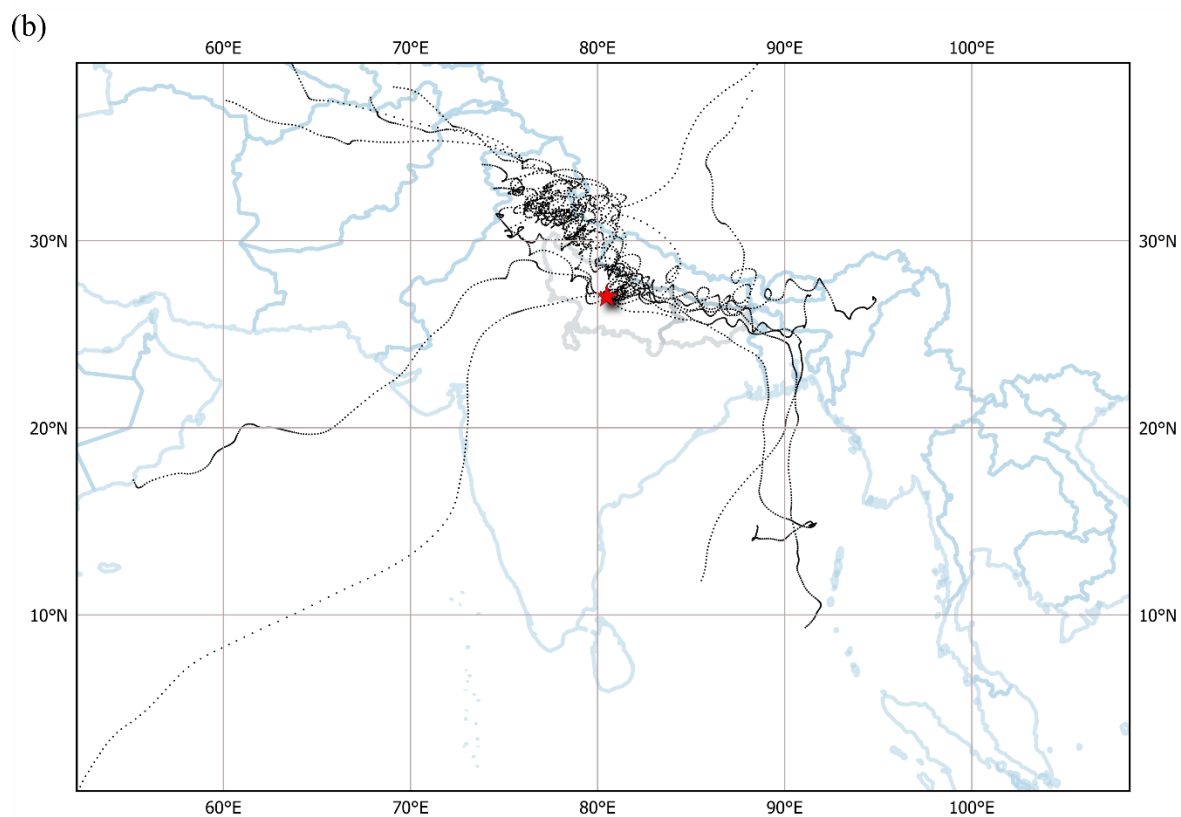

220 **Supplementary Figure 19. Backward air Trajectory Plot using NOAA HYSPLIT Model.**  
 221 Backward trajectory ending at 9:00 UTC (Local time 14:30) for 20 seasonal maximum wet bub  
 222 temperature day (considering April-May from 2001-2020) with source at (a) Bihar (26°N 86°E)  
 223 (b) Uttar Pradesh (27.0°N 80.5°E)



224 **Supplementary Tables**

225 **Supplementary Table 1. Pre-monsoon season crop calendar for Indo-Gangetic Plain**  
 226 **states based on crop production statistics and the annual Indian Agricultural Statistics**  
 227 **report . The total water use for each crop is based on Fishman et al. (2015)**

| <b>Crops/<br/>States</b> | <b>Bihar</b>           | <b>Haryana</b>         | <b>Punjab</b>          | <b>Rajasthan</b>       | <b>Uttar<br/>Pradesh</b> | <b>Total wateruse<br/>(mm/hectare)</b> | <b>Remarks</b>        |
|--------------------------|------------------------|------------------------|------------------------|------------------------|--------------------------|----------------------------------------|-----------------------|
| <b>Paddy</b>             | S:Feb-Mar<br>H:Jul-Aug |                        |                        |                        | S:Feb-Mar<br>H:Jul-Aug   | <b>1500</b>                            | Pre-monsoon           |
| <b>Maize</b>             | S:Feb-Mar<br>H:May-Jun | S:Feb-Mar<br>H:May-Jun | S:Feb-Mar<br>H:Apr-May |                        | S:Feb-Mar<br>H:Apr-May   | <b>650</b>                             |                       |
| <b>Gram</b>              | S:Feb-Mar<br>H:May-Jun |                        |                        |                        | S:Feb-Mar<br>H:May-Jun   | <b>240</b>                             |                       |
| <b>Sunflower</b>         |                        | S:Feb-Mar<br>H:Apr-May | S:Feb-Mar<br>H:Apr-May |                        | S:Feb-Mar<br>H:Apr-May   | <b>500</b>                             |                       |
| <b>Sugarcane</b>         | S:Feb-Mar<br>H:Nov-Feb | S:Feb-Mar<br>H:Nov-Feb | S:Feb-Mar<br>H:Nov-Feb | S:Feb-Mar<br>H:Nov-Feb | S:Feb-Mar<br>H:Nov-Feb   | <b>533.33</b>                          | 1600/3<br>(seasons=3) |

Based on Indian Agricultural Statistics crop calendar and pre-monsoon crop production data .

(S=Sowing, H-Harvesting)

228 **Supplementary Table 2. Impact of agricultural census-based irrigation (AGR) on**  
 229 **meteorological variables spatially averaged over Indo-Gangetic Plain with significance**  
 230 **test for change due to irrigation.** Difference between AGR and CTL experiment is taken for  
 231 pre-monsoon season (April-May) from 2004-2016. Two sample t-test at daily scale and annual  
 232 scale. The test rejects the null hypothesis at the 5% significance level.

| <b>Indo-Gangetic Plain (All land area)</b>                                                                          |                  |                     |                        |                       |                       |                        |
|---------------------------------------------------------------------------------------------------------------------|------------------|---------------------|------------------------|-----------------------|-----------------------|------------------------|
| Variable (April-May Annual Mean: 2004-2016)                                                                         | Irrigation (AGR) | No Irrigation (CTL) | Difference (AGR - CTL) | Percentage Change (%) | P-value (Daily Scale) | P-value (Annual Scale) |
| T2 (°C)                                                                                                             | 30.009           | 30.409              | -0.400                 | -1.314                | 0.00099               | 0.34377                |
| Tmax (°C)                                                                                                           | 36.427           | 36.975              | -0.548                 | -1.483                | 0.00033               | 0.24629                |
| Latent Heat (W/m <sup>2</sup> )                                                                                     | 35.359           | 29.718              | 5.642                  | 18.984                | 0.00000               | 0.04339                |
| Sensible Heat (W/m <sup>2</sup> )                                                                                   | 88.249           | 90.804              | -2.555                 | -2.814                | 0.00134               | 0.18368                |
| PBL Height (m)                                                                                                      | 1291.748         | 1325.935            | -34.188                | -2.578                | 0.00312               | 0.26439                |
| Specific Humidity (kg/kg)                                                                                           | 0.0091           | 0.0086              | 0.0005                 | 5.355                 | 0.00139               | 0.12680                |
| Relative Humidity (%)                                                                                               | 36.083           | 33.611              | 2.472                  | 7.355                 | 0.00034               | 0.16410                |
| Wet-bulb Temp -Tw (°C)                                                                                              | 18.319           | 18.049              | 0.269                  | 1.493                 | 0.02192               | 0.26588                |
| Significance Test is based on two sample t-test. The test rejects the null hypothesis at the 5% significance level. |                  |                     |                        |                       |                       |                        |
